# Supplementary material for: A Comparative Study of Six Indigenous Chinese Large Language Models' Understanding Ability: An Assessment Based on 132 College Entrance Examination Objective Test Items
Source: Research Square preprint supplement (doi:10.21203/rs.3.rs-5990278/v1), 2025-03-26
Supplement: Supplementary file 1 [file 534d2f0aa577dd8d27928277.xlsx]

## Sheet: Sheet1
Question type		Language application	Classical Chinese reading	Ancient poetry reading	Modern text reading	Total
Total		19	36	12	65	132
Tongyi Qianwen	Accuracy	0.74	0.56	0.83	0.75	0.7
	Error	0.26	0.39	0.17	0.23	0.27
GLM-4	Accuracy	0.47	0.58	0.92	0.77	0.69
	Error	0.47	0.36	0.08	0.22	0.28
Xunfei Spark	Accuracy	0.74	0.67	0.42	0.6	0.62
	Error	0.21	0.28	0.17	0.25	0.24
Wenxin Yiyan	Accuracy	0.37	0.39	0.83	0.74	0.6
	Error	0.58	0.5	0.17	0.26	0.36
KimiChat	Accuracy	0.58	0.39	0.67	0.6	0.57
	Error	0.42	0.58	0.33	0.35	0.42
Baichuan	Accuracy	0.47	0.47	0.67	0.58	0.55
	Error	0.53	0.5	0.33	0.42	0.45
M±SD	Accuracy	56%±15%	51%±11%	72%±18%	68%±9%	62%±6%
	Error	41±15%	44%±11%	21%±10%	29%±8%	34±9%
